# Supplementary material for: One-pot construction of robust BiOCl/ZnO p–n heterojunctions with semi-coherent interfaces toward improving charge separation for photodegradation enhancement
Source: Royal Society of Chemistry journal article supplement (doi:10.1039/d1na00396h), 2021-01-01
Supplement: d1na00396h1.pdf [file d1na00396h1.pdf]

***Supporting Information***

**One-pot construction of robust BiOCl/ZnO p-n heterojunctions toward improving charge separation for photodegradation enhancement**

**Xiaoli Yang, Shaodong Sun,\* Jie Cui, Man Yang,\* Qing Yang, Peng Xiao and Shuhua Liang\***

*Engineering Research Center of Conducting Materials and Composite Technology, Ministry of Education; Shaanxi Engineering Research Centers of Metal-Based Heterogeneous Materials and Advanced Manufacturing Technology; Shaanxi Province Key Laboratory for Electrical Materials and Infiltration Technology; School of Materials Science and Engineering, Xi'an University of Technology, Xi'an 710048, Shaanxi, People's Republic of China.*

**Email:** *sdsun@xaut.edu.cn (S. D. Sun); myang@xaut.edu.cn (M. Yang); liangsh@xaut.edu.cn (S. H. Liang).*

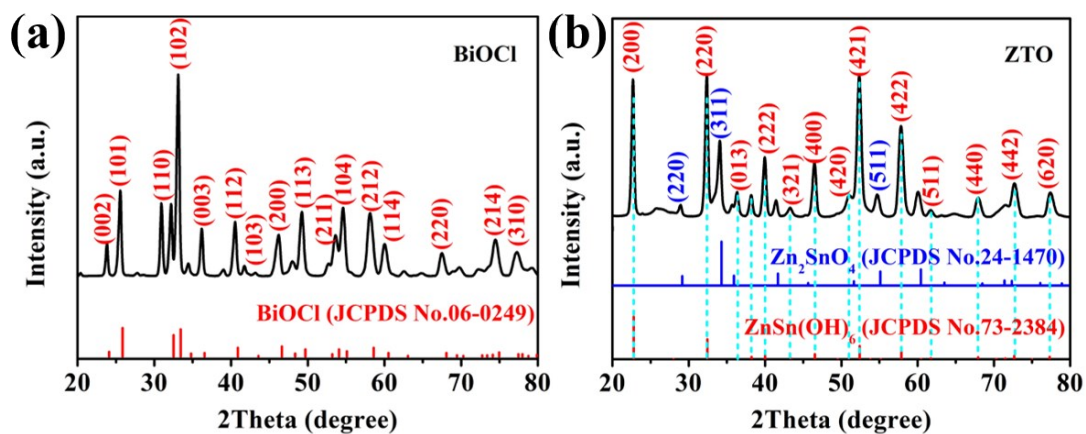

Fig. S1 XRD patterns of the as-prepared (a) BiOCl and (b) ZTO.

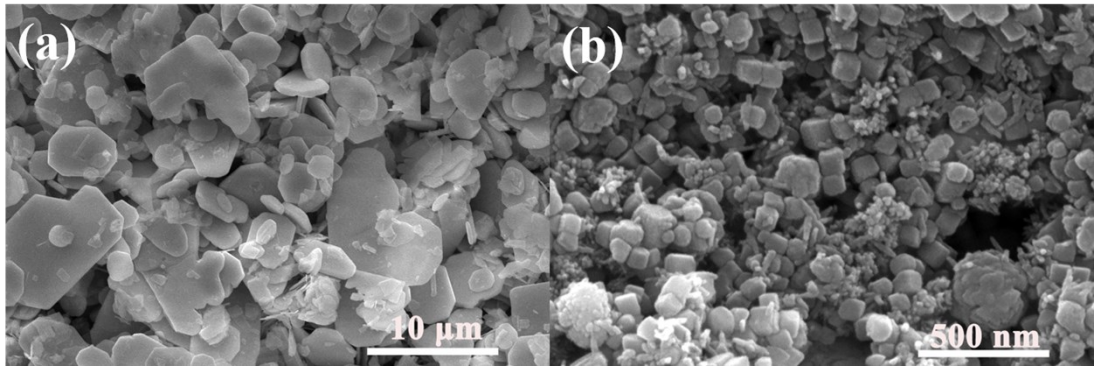

**Fig. S2** SEM images of (a) BiOCl and (b) ZTO.

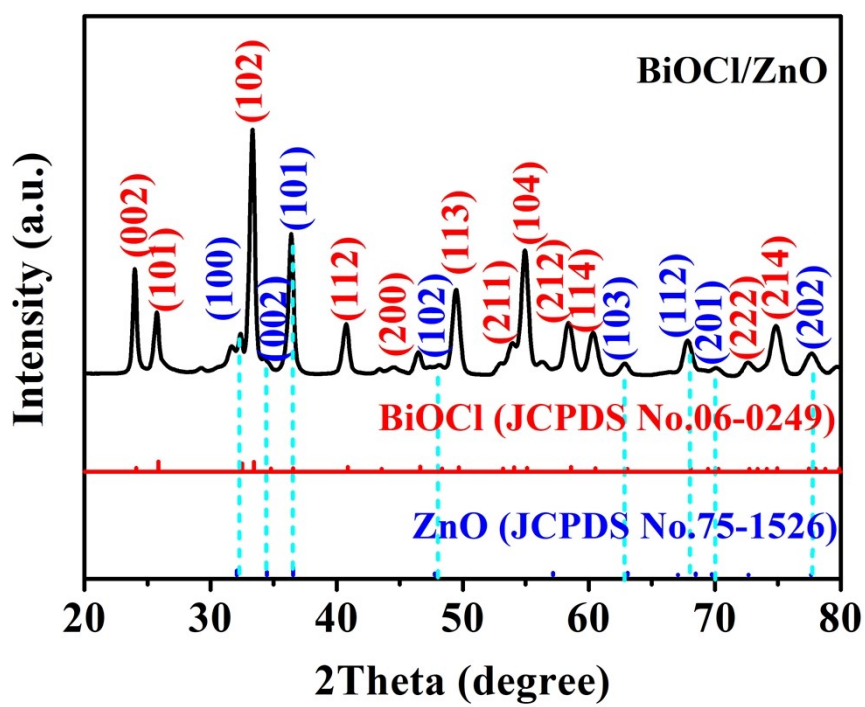

Fig. S3 XRD pattern of the as-prepared BZ-0.67-S.

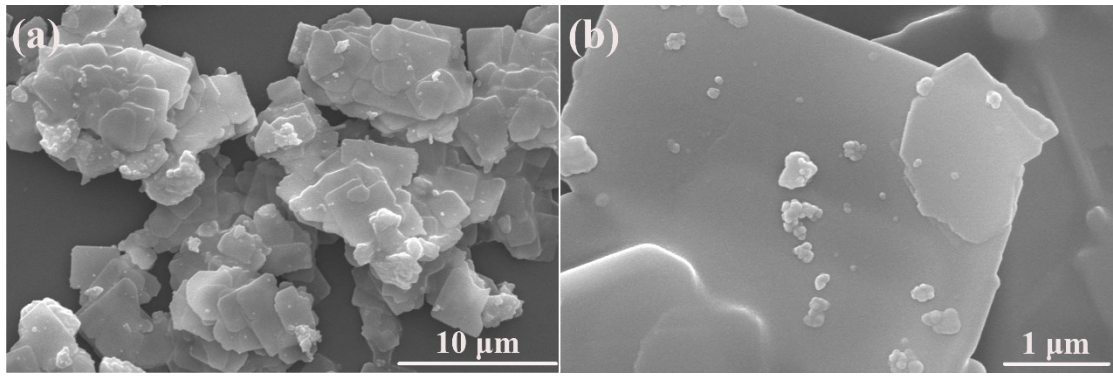

**Fig. S4** SEM images of BZ-0.67-S.

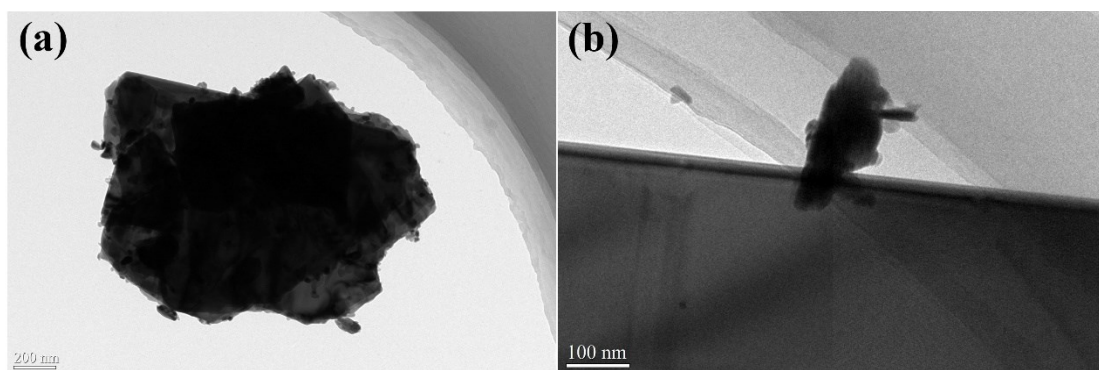

**Fig. S5** TEM images of BZ-0.67-S.

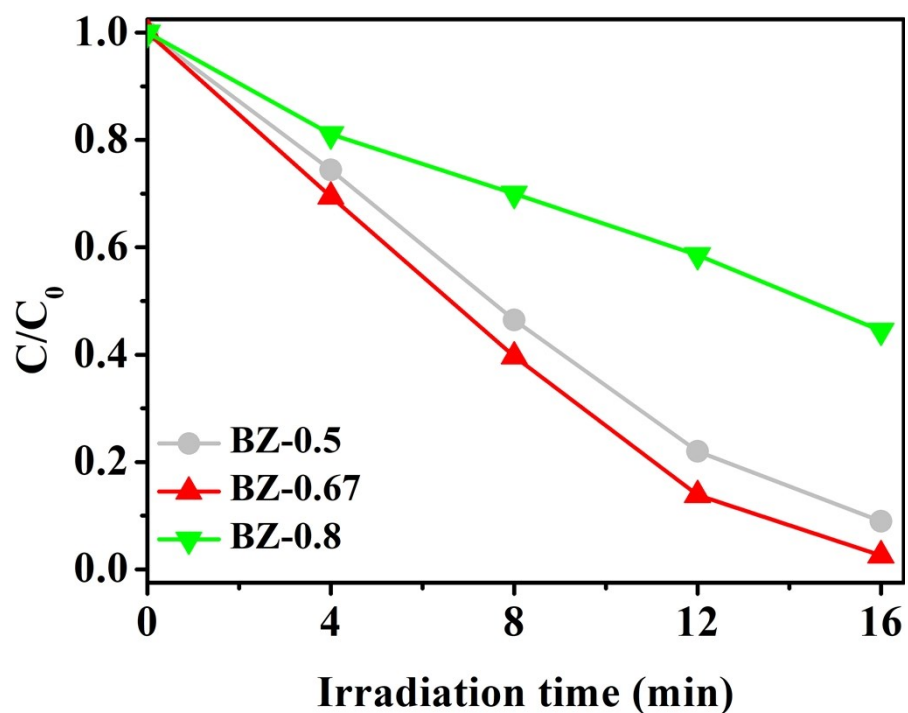

**Fig. S6** Photocatalytic degradation of RhB solution by BZ-0.5, BZ-0.67 and BZ-0.8, respectively.

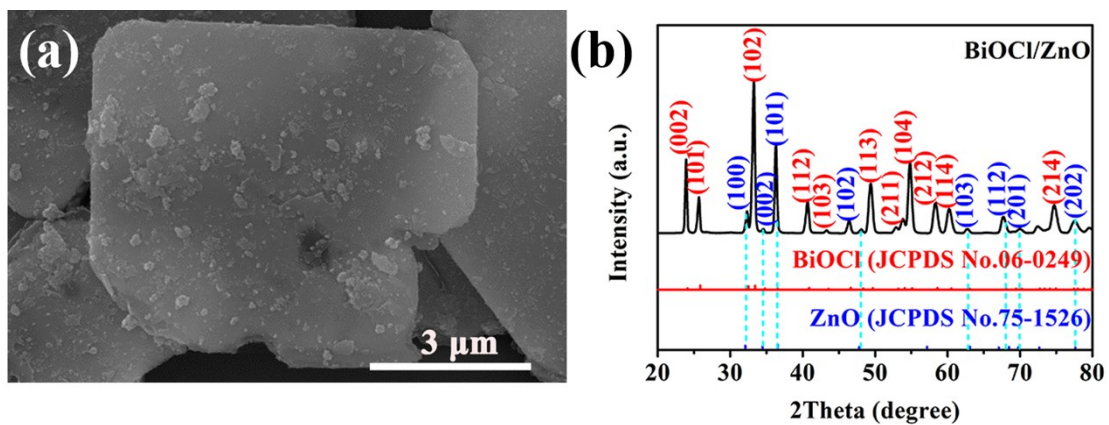

**Fig. S7** (a) SEM image and (b) XRD pattern of BZ-0.67 after recycling test.



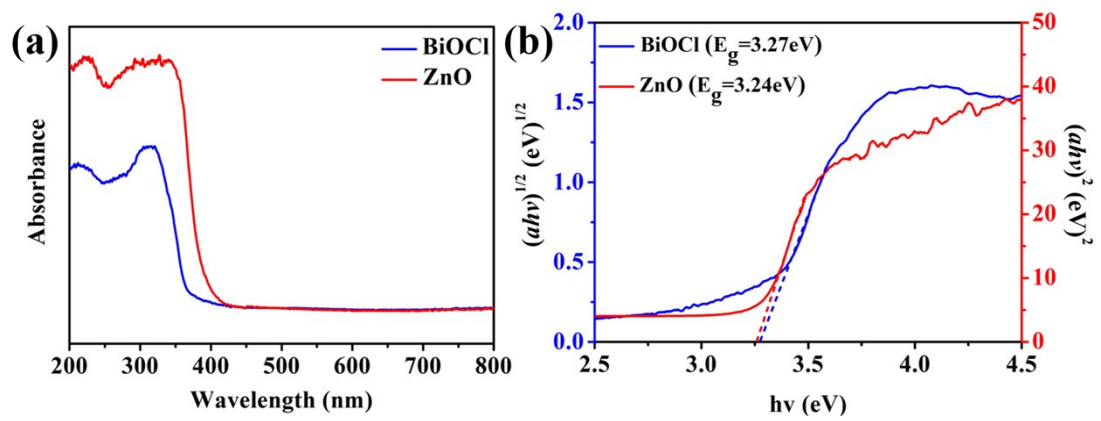

**Fig. S8** (a) UV-vis diffuse reflectance spectra of BiOCl and ZnO; (b) plots of  $(ah\nu)^{1/2}$  and  $(ah\nu)^2$  versus photo energy ( $h\nu$ ) of BiOCl and ZnO, respectively.

**Table S1** The rate constants ( $k$ ) for photodegradation of BiOCl/ZnO reported in literatures and this work.

| Sample    | Substrate | Rate constants ( $k$ ) | Ref.      |
|-----------|-----------|------------------------|-----------|
| BiOCl/ZnO | RhB       | 0.0073                 | [1]       |
| BiOCl/ZnO | RhB       | 0.408                  | [2]       |
| BiOCl/ZnO | TC-HCl    | 0.024                  | [3]       |
| BiOCl/ZnO | RhB       | 0.19                   | This work |
| BiOCl/ZnO | TC        | 0.049                  | This work |

**Table S2** ICP results of the leaching metal in solution after reaction over BZ-0.67.

| Element content (ppm) |     |
|-----------------------|-----|
| Bi                    | Zn  |
| 2                     | 1.9 |

- [1] X.R. Zhang, Y.W. Huo, M. Shakeel, B.S. Li, L. Wang, J.J. Liu and S.L. Zuo, *ChemistrySelect*, 2020, **5**, 1640-1647.
- [2] J.Q. Chang, Y. Zhong, C.H. Hu, J.L. Luo and P.G. Wang, *J. Mol. Struct.*, 2019, **1183**, 209-216.
- [3] X.Q. Liu, H.M. Xu, D.Y. Li, Z.W. Zou and D.S. Xia, *ChemistrySelect*, 2019, **4**, 12245-12251.
